# Supplementary material for: Isolation of Mycosporine-like Amino Acids from Red Macroalgae and a Marine Lichen by High-Performance Countercurrent Chromatography: A Strategy to Obtain Biological UV-Filters
Source: MDPI journal article supplement (doi:10.3390/md21060357), 2023-06-10
Supplement: s1 [file s1]

## Supplementary material

### **Isolation of mycosporine-like amino acids from red macroalgae and a marine lichen by high performance countercurrent chromatography: a strategy to obtain biological UV-filters**

Julia Vega<sup>1\*</sup>, Daniela Bárcenas-Pérez<sup>2,3</sup>, David Fuentes-Ríos<sup>4</sup>, J. Manuel López-Romero<sup>4</sup>, Pavel Hrouzek<sup>2</sup>, Felix L. Figueroa<sup>1</sup> and José Cheel<sup>2\*</sup>

<sup>1</sup> Universidad de Málaga, Instituto Andaluz de Biotecnología y Desarrollo Azul (IBYDA), Centro Experimental Grice Hutchinson, Lomas de San Julián, 2, 29004-Málaga, Spain

<sup>2</sup> Laboratory of Algal Biotechnology – Centre ALGATECH, Institute of Microbiology of the Czech Academy of Sciences, Opatovický mlýn, 379 81 Třeboň, Czech Republic

<sup>3</sup> Faculty of Science, University of South Bohemia, Branišovská 1760, 370 05 České Budějovice, Czech Republic

<sup>4</sup> Department of Organic Chemistry, Faculty of Sciences, University of Malaga, Campus de Teatinos s/n, 29071 Malaga, Spain

\* corresponding author: [juliavega@uma.es](mailto:juliavega@uma.es); [jcheel@alga.cz](mailto:jcheel@alga.cz)

**Figure S1.** Absorbance at 334nm (maximum absorbance of porphyra-334) and conductivity measurement during the porphyra-334 enriched fraction desalting process using Sephadex G-10. In which, two different fractions were obtained, a desalted MAAs enriched fraction (red) and a salted MAAs enriched fraction (blue).

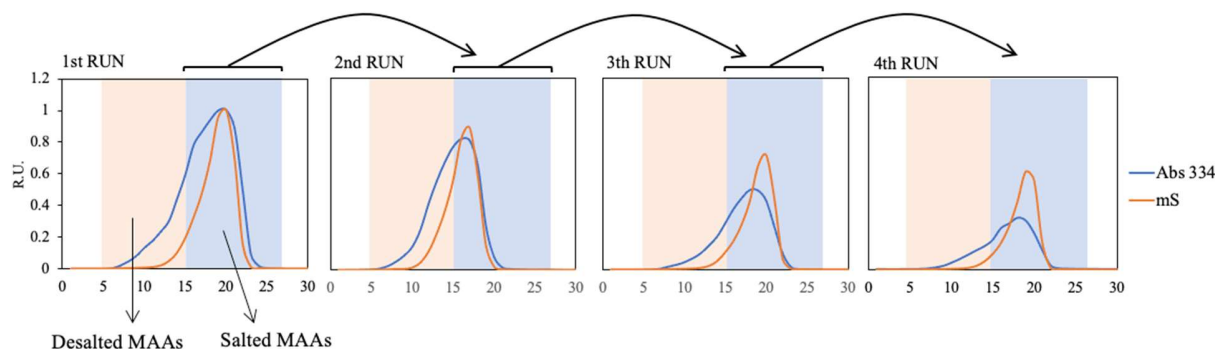

**Figure S2.** Diagram including the amount and recovery rates (%) of the five isolated mycosporine-like amino acids (MAAs: shinorine, porphyra-334, palythine, asterina-330 and mycosporine-serinol) from two red macroalgae (*Pyropia columbina* and *Gelidium corneum*) and a marine lichen (*Lichina pygmaea*) during all the steps of the isolation process (HPCCC procedure, cleanings with methanol and permeation in Sephadex G-10).

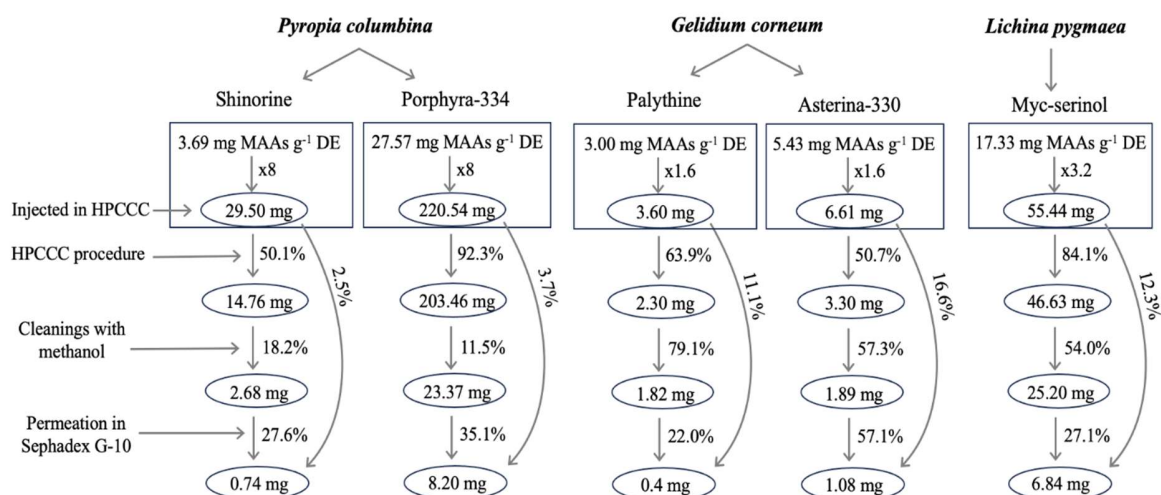

**Figure S3.** Mass spectrum (70-700 m/z) of the different mycosporine-like amino acids enriched fractions obtained from *Pyropia columbina*, *Gelidium corneum* and *Lichina pygmaea* extracts. A) Shinorine enriched fraction, B) Porphyra-334 enriched fraction, C) Palythine enriched fraction, D) Asterina-330 enriched fraction and E) Mycosporine-serinol enriched fraction.

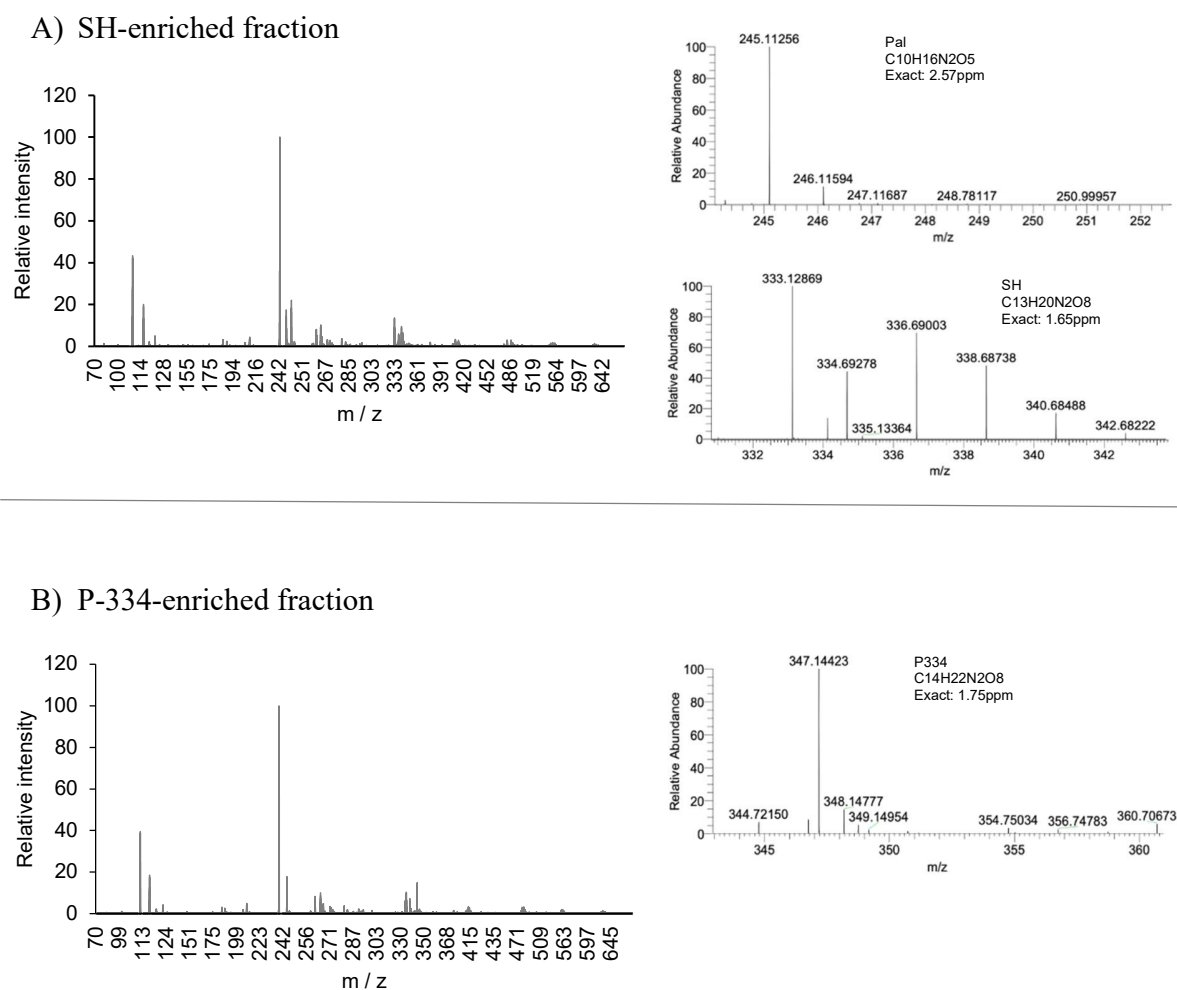

### C) Pal-enriched fraction

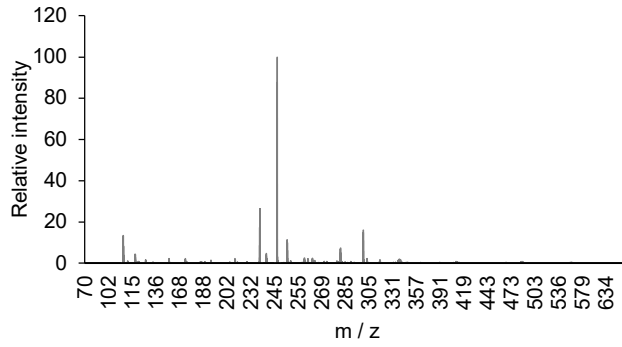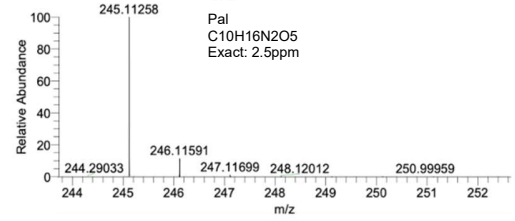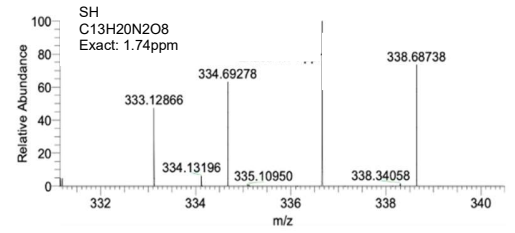

### D) Ast-330-enriched fraction

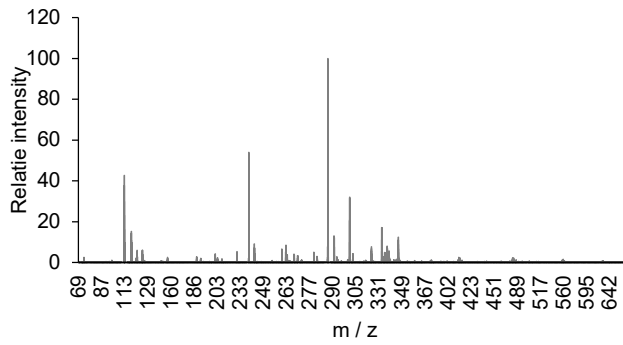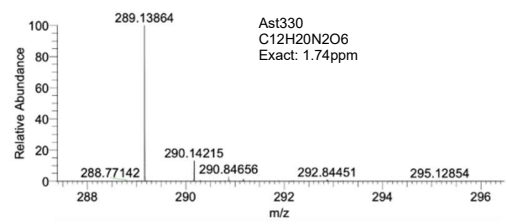

### E) M-ser-enriched fraction

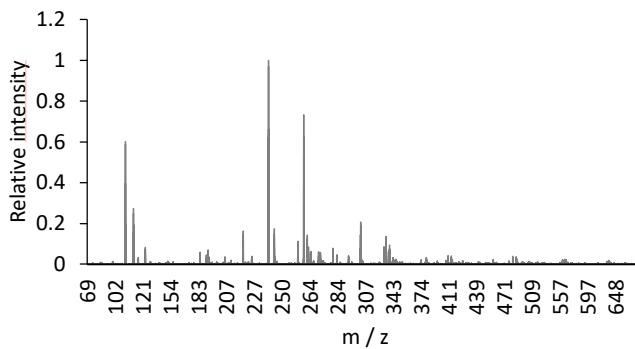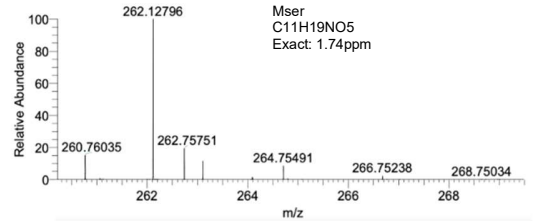

**Figure S4.**  $^1\text{H}$ -NMR and  $^{13}\text{C}$ -NMR spectrum of the different mycosporine-like amino acids enriched fractions obtained from *Pyropia columbina*, *Gelidium corneum* and *Lichina pygmaea* extracts. A) Shinorine enriched fraction, B) Porphyra-334 enriched fraction, C) Palythine enriched fraction, D) Mycosporine-serinol enriched fraction.

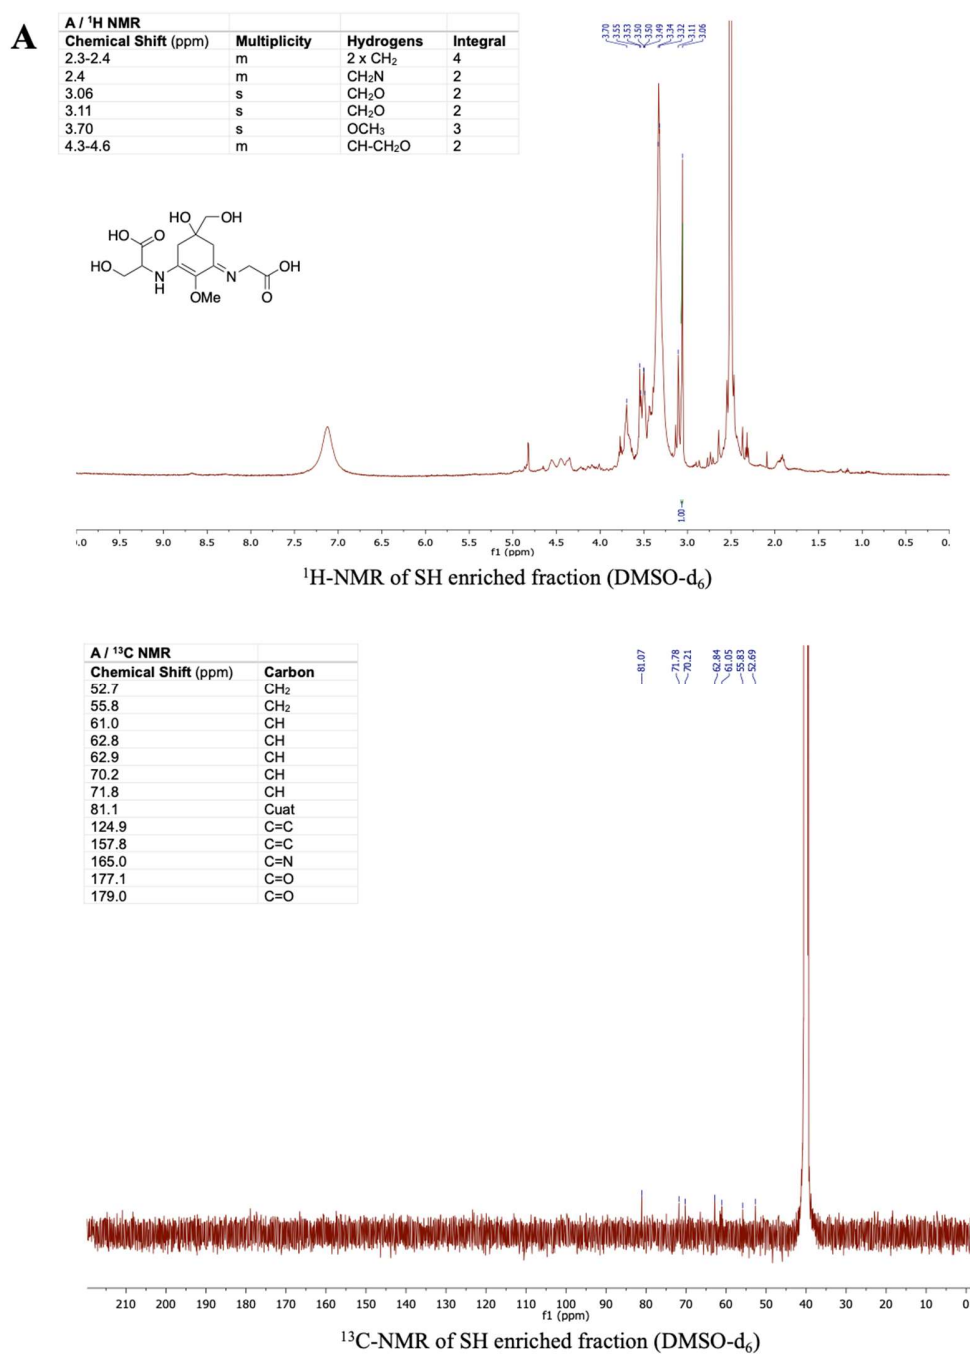

**B**

| B / <sup>1</sup> H NMR |              |                       |          |
|------------------------|--------------|-----------------------|----------|
| Chemical Shift (ppm)   | Multiplicity | Hydrogens             | Integral |
| 1.05                   | d, 2.5 Hz    | CH <sub>3</sub>       | 3        |
| 2.5-2.6                | m            | 2 x CH <sub>2</sub>   | 4        |
| 2.7                    | m            | CH <sub>2</sub> N     | 2        |
| 3.2-3.3                | m            | 2 x CH <sub>2</sub> O | 4        |
| 3.56                   | s            | OCH <sub>3</sub>      | 3        |
| 4.0                    | m            | NCH-CHO               | 2        |

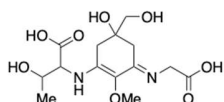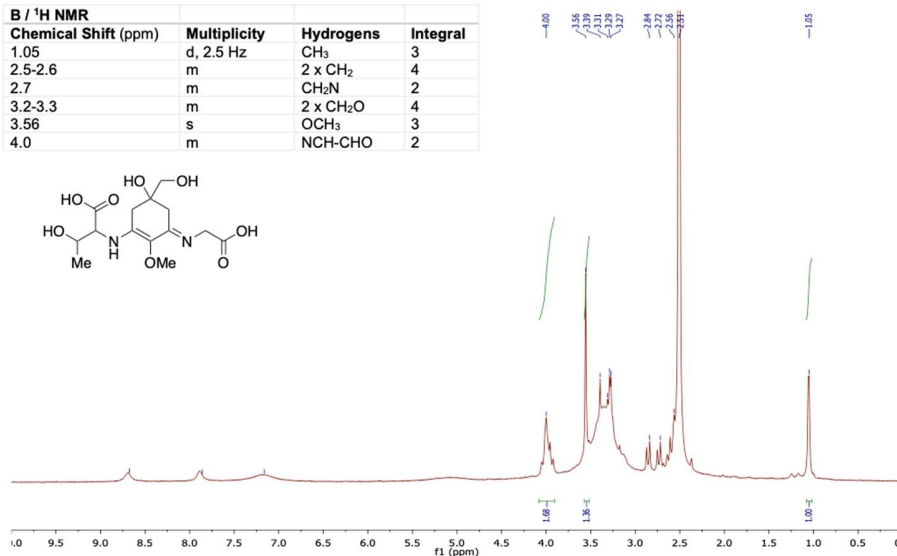

<sup>1</sup>H-NMR of P-344 enriched fraction (DMSO-d<sub>6</sub>)

| B / <sup>13</sup> C NMR |                 |
|-------------------------|-----------------|
| Chemical Shift (ppm)    | Carbon          |
| 19.9                    | CH              |
| 33.2                    | CH <sub>2</sub> |
| 33.8                    | CH <sub>2</sub> |
| 58.9                    | CH              |
| 61.1                    | CH              |
| 62.8                    | CH              |
| 66.7                    | CH              |
| 67.9                    | CH              |
| 70.8                    | Quat            |
| 125.0                   | C=C             |
| 147.8                   | C=C             |
| 159.9                   | C=N             |
| 176.5                   | C=O             |
| 180.1                   | C=O             |

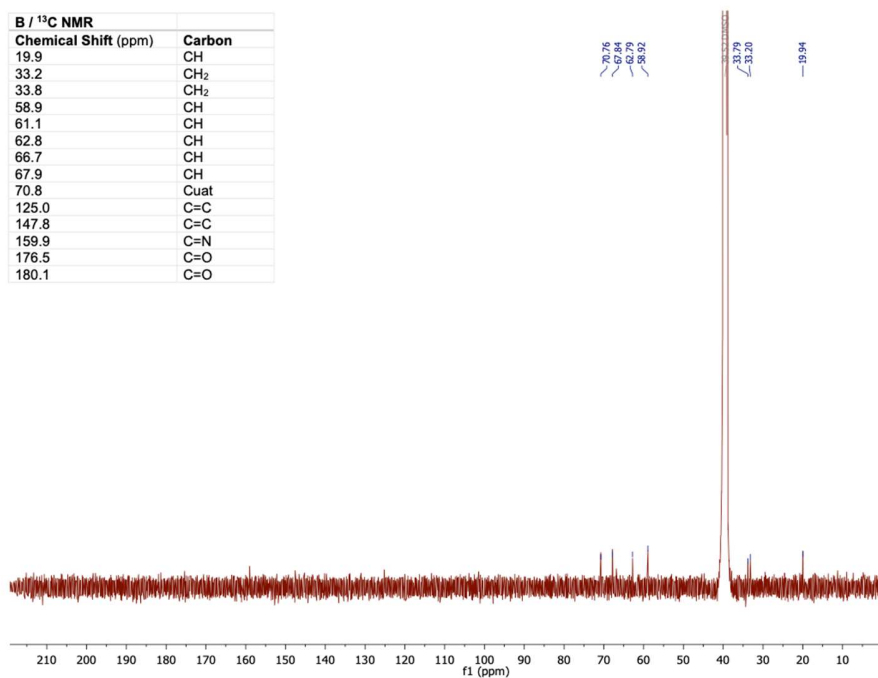

<sup>13</sup>C-NMR of P-344 enriched fraction (DMSO-d<sub>6</sub>)

C

| C / <sup>1</sup> H NMR |              |                     |          |
|------------------------|--------------|---------------------|----------|
| Chemical Shift (ppm)   | Multiplicity | Hydrogens           | Integral |
| 2.6-2.8                | m            | 2 x CH <sub>2</sub> | 4        |
| 3.3                    | s            | CH <sub>2</sub> N   | 2        |
| 3.6                    | s            | OCH <sub>3</sub>    | 3        |

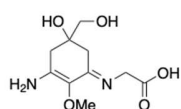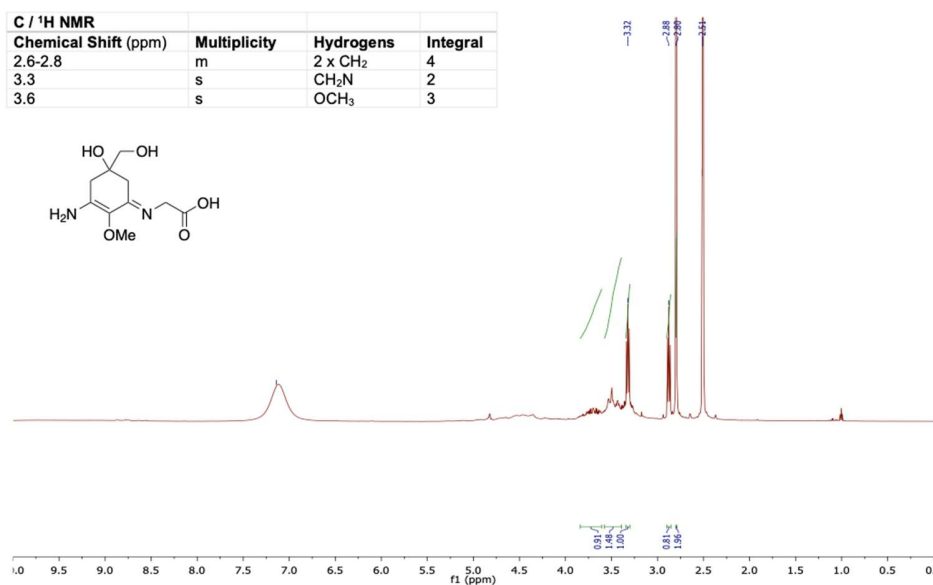<sup>1</sup>H-NMR of Pal enriched fraction (DMSO-d<sub>6</sub>)

| C / <sup>13</sup> C NMR |                 |
|-------------------------|-----------------|
| Chemical Shift (ppm)    | Carbon          |
| 61.0                    | CH <sub>2</sub> |
| 63.5                    | CH <sub>2</sub> |
| 68.2                    | CH              |
| 70.2                    | CH              |
| 70.8                    | CH              |
| 81.0                    | Quat            |
| 100.0                   | C=C             |
| 105.0                   | C=C             |
| 159.9                   | C=N             |

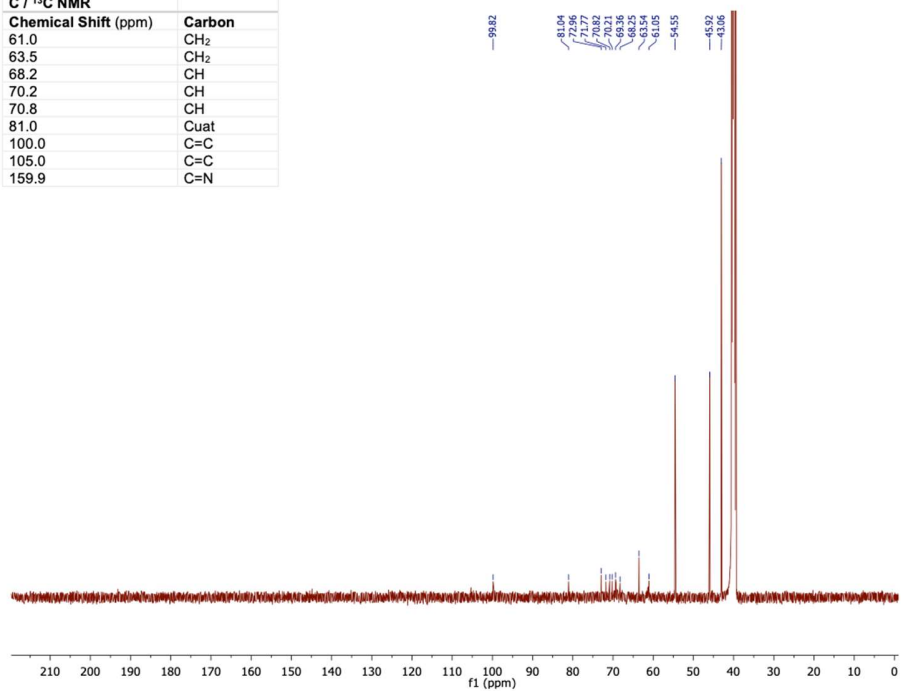<sup>13</sup>C-NMR of Pal enriched fraction (DMSO-d<sub>6</sub>)

**D**

| D / <sup>1</sup> H NMR |              |                       |          |
|------------------------|--------------|-----------------------|----------|
| Chemical Shift (ppm)   | Multiplicity | Hydrogens             | Integral |
| 2.10-2.13              | m            | 2 x CH <sub>2</sub>   | 4        |
| 3.2                    | m            | CHN                   | 1        |
| 3.4-4.1                | m            | 3 x CH <sub>2</sub> O | 6        |
| 3.59                   | s            | OCH <sub>3</sub>      | 3        |

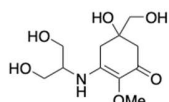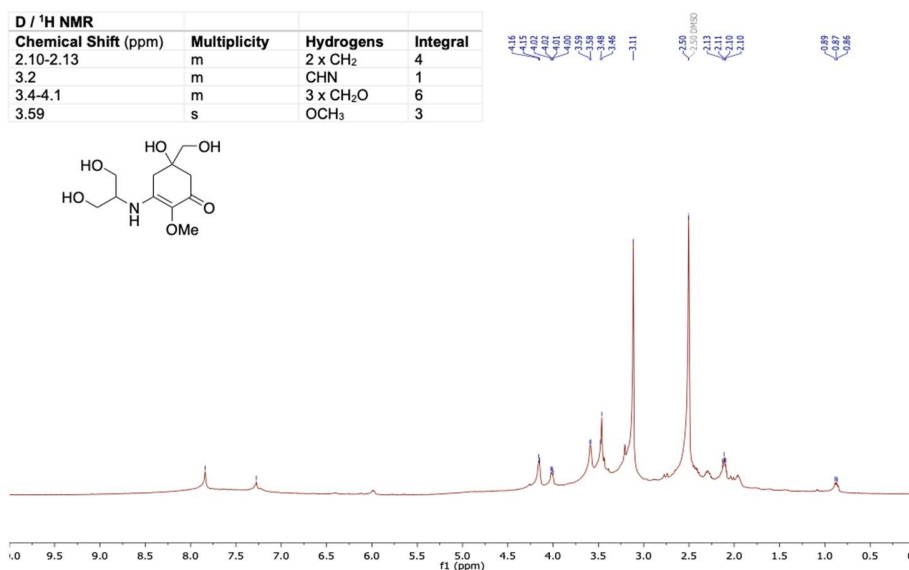

<sup>1</sup>H-NMR of M-ser enriched fraction (DMSO-d<sub>6</sub>)

| D / <sup>13</sup> C NMR |                 |
|-------------------------|-----------------|
| Chemical Shift (ppm)    | Carbon          |
| 25.2                    | CH <sub>2</sub> |
| 29.6                    | CH <sub>2</sub> |
| 53.5                    | CH              |
| 55.5                    | CH              |
| 61.4                    | CH              |
| 72.1                    | Cuat            |
| 127.8                   | C=C             |
| 130.4                   | C=C             |
| 175.1                   | C=O             |

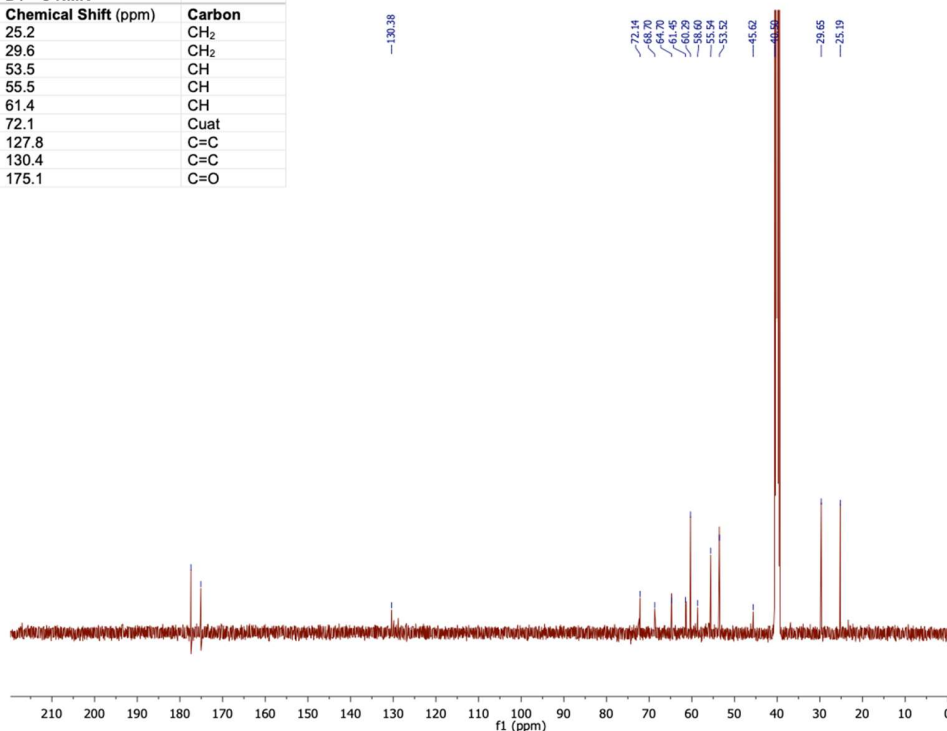

<sup>13</sup>C-NMR of M-ser enriched fraction (DMSO-d<sub>6</sub>)
